# Supplementary material for: CX3CR1 Acts as a Protective Biomarker in the Tumor Microenvironment of Colorectal Cancer
Source: Front Immunol. 2022 Jan 24;12:758040. doi: 10.3389/fimmu.2021.758040 (PMC8818863; doi:10.3389/fimmu.2021.758040)
Supplement: Supplementary file 3 [file Table_3.xlsx]

## Sheet: Sheet1
Names	total	elements
Imm_UP Str_UP	1353	CLMP
		MMP2
		MLC1
		TNIP3
		PKNOX2
		ITGA5
		KRTAP2-2
		RXFP3
		PSTPIP1
		MEFV
		GLT1D1
		AKAIN1
		LINC02073
		ADAM12
		OTOP2
		CRTAM
		IGF1
		BCAR4
		NTRK1
		CCDC177
		HS3ST3A1
		RTN1
		LILRB2
		SIRPB2
		GZMM
		SLC2A5
		LCE3E
		ZG16
		CDK14
		FGR
		C16orf54
		AQP9
		UGT2B17
		CCDC190
		HLA-DRB5
		SPN
		UNC5A
		EVC
		CXCL13
		FFAR3
		SUSD2
		PCOLCE
		LEP
		CSF3R
		SERPINF1
		LAX1
		CCL22
		BMP3
		PRKCB
		LIPN
		HCST
		SIGLEC8
		C5AR1
		PIK3R5
		GLT8D2
		KRT1
		SIGLEC9
		TLR1
		ELANE
		TENM4
		FEV
		COL1A1
		CLC
		CD1A
		KCNA1
		CCN4
		FOXP3
		PRR16
		ARL14EPL
		UTS2B
		SELL
		NIBAN3
		CAVIN3
		GFPT2
		PYY
		CCL19
		ADGRE3
		CLEC4E
		HTR7
		TNFRSF9
		MS4A2
		PODN
		LAIR1
		EVI2A
		GIMAP1
		ISM1
		LINC00656
		APOE
		TNNT3
		GYPC
		ST8SIA4
		C3
		FOXI2
		GDF10
		MZB1
		FNDC1
		TMEM255A
		TMEM26-AS1
		SERPING1
		NFE4
		KIR2DL4
		P4HA3
		SAMSN1
		IL24
		LINC02518
		EMILIN1
		FCN1
		TNXB
		A4GALT
		EMX2
		HLA-DRA
		CHST11
		SLC9A9
		PNLDC1
		ADAMTS16
		RCSD1
		LINC01679
		RHOH
		GMFG
		PRSS21
		SLAMF1
		DPYD
		SDC2
		LINC01857
		SLITRK4
		FGF6
		ZNF467
		CALHM5
		TRARG1
		PILRA
		MFAP5
		GPR171
		CHRNB2
		TM6SF1
		CHI3L1
		CD53
		CD300A
		TFAP2B
		CLDN6
		IGFBP7-AS1
		LINC01168
		LINC01502
		DIRC1
		PNOC
		KRT222
		ADAMTS2
		UGT2B4
		ARHGAP15
		CCR3
		PSG4
		LILRA6
		SPRR2B
		DCSTAMP
		PAEP
		TUBA3E
		MIR3945HG
		MLN
		IL5RA
		PTGER1
		IL18BP
		GPR1-AS
		TTTY14
		HK3
		KRT17
		LRRC53
		PRG3
		RSPO2
		PLPP7
		LOXL1
		GLYATL2
		RIMBP3
		SORCS2
		MEGF10
		PRRX1
		BTK
		PRND
		TAGAP
		MILR1
		HCK
		IL22RA2
		TFEC
		SFRP2
		TBX21
		TNFAIP6
		LINC01093
		KLHL6
		NPFFR2
		HRH2
		ZFPM2
		S100A3
		DEFB4A
		SPRR2F
		PDGFRB
		LINC02828
		CGB3
		NTM
		APBA2
		FRMPD4
		NGFR
		TCF21
		COL23A1
		SLA
		CMA1
		PTCRA
		LINC02079
		PI15
		BRINP3
		GSDME
		COL5A2
		UCN2
		SELP
		ANXA8
		HLA-DOA
		SERPINB13
		THY1
		P2RY8
		C5orf46
		DSE
		TNFRSF17
		CLEC2A
		DPYSL4
		PARAL1
		ANTXR1
		SIRPG
		SHISAL1
		LRP1B
		TMEM244
		SPP1
		CASP14
		ARHGAP25
		HCAR2
		FAM81B
		ZDHHC22
		GPR174
		PTGS2
		OSM
		APOBEC3A
		OLR1
		B3GALT5-AS1
		EHD2
		NCF1
		RASAL3
		CD2
		SCRT2
		HPGDS
		GPR33
		IL21R
		FAM78A
		FCGR3A
		IGLL5
		CLPS
		TMEM229A
		FCAR
		UPK2
		CIBAR2
		CTSK
		IL4I1
		SIGLEC1
		MSR1
		CCL4
		CLEC4M
		S100B
		LAMC3
		MGP
		SOST
		LGALS12
		HPCAL4
		PLEKHO2
		SST
		LST1
		CMKLR1
		FLI1
		CD79B
		GPR1
		MXRA5
		GRM1
		PAGE2
		ITK
		LINC02147
		TSPYL5
		ADGRE2
		TDRD9
		KLRC4
		GNG2
		ZNF705A
		RAB44
		ITGB2
		FOLR2
		CTCFL
		CD72
		SPATC1
		CDH11
		PIK3CD
		GIMAP6
		TGFB1
		TEX26
		EOMES
		SCARF2
		GAST
		CHST2
		KRT34
		KRT31
		PTGIR
		CHIT1
		PEAK3
		MRC1
		KCNIP1
		VAV3-AS1
		L3MBTL4-AS1
		BGN
		THEMIS2
		KRT78
		IL13
		CD86
		RGS18
		SLC11A1
		POU2F2
		KIR2DL1
		LINC01043
		LILRA5
		GBP4
		IBSP
		NNMT
		GFRA2
		ADCYAP1R1
		MMP1
		CDH20
		CPZ
		PDE6G
		HLA-DQA1
		ABI3
		COL8A1
		IGFBP5
		LINC02381
		MMP12
		RERGL
		COLEC12
		IL18RAP
		NRROS
		LINC01351
		CER1
		PRRX2
		CCR7
		ZIK1
		BCL2A1
		RGS1
		CR1
		PSG7
		MRO
		ADAMTS12
		FGD2
		MS4A3
		EFEMP1
		LINC01638
		BNC1
		P2RY14
		LINC01140
		CYTH4
		IGSF21
		FPR1
		GALNT15
		FMNL1
		LINC02084
		PTPRC
		CCR4
		GNLY
		MMP11
		CD14
		PLPP4
		ARHGAP20
		SLA2
		SDS
		PARVG
		CHGB
		IFFO1
		MDGA1
		AMPH
		CCL11
		LINC00900
		IDO1
		KCNE1B
		PPY
		CCL23
		LUM
		SLC1A6
		C1S
		PDE2A-AS2
		UBASH3B
		CD1B
		FCGR2A
		STARD8
		CALML5
		SHISAL2A
		LINC01050
		CLEC4D
		EBI3
		GSC
		UNCX
		ADA2
		MMP3
		MRAS
		CCL18
		AXL
		CRABP2
		F13A1
		PM20D1
		TAFA1
		IRX6
		CXCR1
		LGALS7
		HCG22
		CYP4F22
		MMP8
		INSM1
		NEUROD2
		CYRIA
		ENTHD1
		DHH
		IL10
		ACP5
		IRX4
		ISLR
		TLR10
		HIC1
		DKK3
		FYB1
		ALOX5AP
		POSTN
		JAML
		CALCB
		VPREB1
		LILRB3
		SPI1
		TREM2
		MS4A4A
		PADI4
		FMO3
		PLAT
		ITGBL1
		NKAIN4
		OVCH1-AS1
		FAM25A
		TESPA1
		CPXM1
		THBS4
		NCAM2
		CYSLTR1
		CHI3L2
		PLA2G2D
		GCSAML
		WNT2
		KRT6C
		LYVE1
		IGFBP6
		TLR7
		STAB1
		LINC02528
		GIMAP4
		CLEC7A
		SLC37A2
		KCNA3
		LINC00523
		LINC00189
		CD28
		TPSB2
		CHRDL2
		CNTN1
		GBP1
		TENM3
		HOXC10
		MEOX2
		AMBN
		HLA-DPB1
		LINC01615
		TUSC3
		EPYC
		LINC00877
		CD74
		KRT16
		SP140
		EVI2B
		TNFSF8
		DNAJC5B
		GABRP
		FBLN2
		NCKAP1L
		EMP3
		CPA3
		SIGLEC12
		COMP
		HLA-DQA2
		VAMP5
		COL6A5
		FCGR3B
		LINC01094
		LILRA1
		MC2R
		DIO2
		CYBB
		CLEC17A
		SCIMP
		UNC13A
		SLC24A4
		FOXI3
		NID2
		SNCG
		PLA2G7
		SEMG2
		LINC01082
		RAX
		FBXO47
		CCL1
		PDE6B
		CXorf21
		SYT11
		HTRA1
		OTOP3
		RAB34
		LINC01926
		P2RY10
		BARX1
		VMO1
		IFNL4
		SLC15A3
		NMRK2
		CD70
		PF4V1
		ITGAX
		CASR
		VASN
		LINC01678
		SLAMF7
		VSTM2A
		MYHAS
		GPR84
		FCRL5
		FGF10
		KRT7
		LINC01940
		MAFB
		RFX6
		BARX1-DT
		RASGRP4
		TWIST2
		SCG3
		GAS1
		CD209
		TNFRSF18
		CXCL10
		STK32B
		LCP2
		IL10RA
		GAB3
		SEZ6L
		FBLN7
		VCAN
		SLFN11
		CYP27C1
		LINC01115
		ICAM3
		SLC1A3
		CCL5
		LNCOG
		LINC01918
		PRRG3
		LOX
		SULF1
		SLN
		SIGLEC5
		LINC01583
		GPR25
		C13orf42
		LINC02773
		SPSB4
		ZNF469
		TRAF3IP3
		LINC02642
		HCN4
		SFTA1P
		HS3ST2
		CD84
		LYPD2
		LINC00968
		CLEC5A
		MEI1
		LINC02408
		ERMN
		LCP1
		DOK2
		HAPLN3
		MAF
		DOK5
		MPEG1
		FPR2
		FCGR1A
		ANKRD33B
		KCNC2
		TAAR1
		SHISA7
		KMO
		METTL11B
		ASTN1
		OR2T10
		ICOS
		KIR3DL3
		SPRR2G
		MARCO
		KCND2
		TCF23
		CXCR6
		IGSF6
		SILC1
		PDCD1LG2
		IL12B
		APOA4
		FCER1G
		ATP2B3
		NLRP12
		LY9
		C11orf96
		NCAN
		NPVF
		TSPAN4
		C1QA
		HAMP
		DCN
		ACTBL2
		CLEC12B
		COL11A1
		GPR68
		IL21
		HTR2A
		S100A12
		TREM1
		COL8A2
		GBP5
		SEMA6B
		CX3CR1
		PDE1B
		DLGAP1-AS3
		CCN5
		SUCNR1
		PIK3R6
		TLR2
		CCIN
		ZNF804A
		OLFM3
		CGB8
		PSG11
		KRT84
		CRLF2
		P2RX7
		PSAPL1
		SERPINB3
		LINC01281
		CIDEB
		TREML1
		FAM20C
		MMP19
		VNN2
		CLEC10A
		EPHA8
		STMN2
		BACH2
		CLEC9A
		IVL
		HAVCR2
		WNT7B
		CCDC178
		CEBPE
		OLIG2
		TWIST1
		DEPP1
		CD3E
		FCRL1
		COL1A2
		LY96
		TMEM26
		IL1R1
		ANKRD34C
		EVL
		PLAAT5
		SYT4
		TYMP
		GGT5
		APOC1
		C1orf162
		ITGAL
		THEMIS
		LINC02587
		HTRA4
		CYP1B1
		COL12A1
		ALPL
		FOLR3
		MEDAG
		CACNA1G
		NXPH2
		SLC6A17
		ALPK2
		CD1C
		EFS
		ADGRE1
		IFIT3
		HOPX
		MEIS1-AS3
		IGFL1
		CCL13
		DERL3
		CASS4
		TSPAN32
		TSPAN11
		IL12RB1
		CHST8
		DIO3
		GNG8
		CCNA1
		ZPLD1
		FGL2
		ADAMTS18
		LINC01820
		PLAU
		MATK
		CHRNE
		LILRA4
		ANXA1
		C1R
		CD300C
		RAB42
		ZNF385D
		C1QC
		CILP
		FCRL6
		MSC
		MMP13
		FAM43B
		KCNE1
		CD4
		DOCK2
		LINC01150
		FAM20A
		FPR3
		PRAM1
		UGT3A1
		SH2D1A
		GIMAP8
		PAX4
		NRP1
		PLEK
		NLRP3
		ST6GALNAC5
		GPNMB
		GPR83
		LINC02495
		CD33
		CDK15
		BASP1
		FCGR2B
		ARHGAP30
		TIMP3
		HRK
		MXRA8
		CCL4L2
		NFATC1
		CCL3L3
		PROK2
		MEOX1
		LINC01127
		ADAMDEC1
		ADGRG3
		APCDD1L
		PTGDR
		ATP8B2
		HLA-DQB1-AS1
		KRT13
		GDF6
		CACNA1E
		IKZF1
		CFAP61
		HRH4
		CHST1
		XIRP1
		LGALS1
		TMIGD3
		ALK
		COL15A1
		LRRC38
		MUC16
		EVC2
		KRTAP4-6
		LILRB4
		LINC02303
		OVAAL
		OSMR
		PNMT
		CYSLTR2
		CSF1
		CLEC2B
		SLC8A3
		DHRS7C
		JAKMIP2
		SLC2A3
		PTHLH
		C3AR1
		CD36
		MAEL
		CGB5
		NCF2
		COPZ2
		TLR6
		CTSW
		CDKN2B-AS1
		CACNG7
		CXCR2
		LY86
		TMEM273
		KLHDC7B
		RASGRP2
		MACORIS
		CFH
		TRO
		IGFBP7
		FCRL3
		LAG3
		C4A
		AQP4
		RD3
		SIGLEC14
		APLNR
		LRRK2-DT
		CHGA
		LINC01366
		SKOR2
		SERPINB7
		CCL7
		CALCA
		CXCL11
		TRG-AS1
		IL31RA
		HCAR3
		OLFM1
		TENM3-AS1
		KIR3DL2
		PLXNC1
		FCGR1B
		PRICKLE2-DT
		CTAG2
		HLA-DQB1
		MMP2-AS1
		CXCL8
		ZNF366
		CCL17
		MCEMP1
		GZMK
		PTGFR
		LRRC25
		LINC01614
		MNDA
		SELE
		CNR1
		TRAT1
		BATF3
		MS4A6A
		IFIT2
		TGM5
		THBD
		ABCD2
		CLEC4C
		NKG7
		SLC32A1
		CD180
		BHLHE22
		MYBPH
		ZNF80
		LTBP2
		COX8C
		SV2B
		ABCA8
		NDUFA4L2
		PGLYRP2
		SERPINB2
		TNFRSF4
		MYBPC3
		TRPV2
		RORB
		STAC2
		KRT24
		LILRA2
		COL6A2
		FBLN1
		TIFAB
		TIGIT
		NCCRP1
		DEFB124
		SPOCK3
		GPRC6A
		EGR2
		NCR3
		HLA-DPA1
		JAKMIP1
		FRMD6
		DLGAP1-AS5
		CD248
		INSL5
		CCR2
		CEACAM4
		SIRPB1
		VEGFC
		FCER1A
		VIM
		REG1B
		TLR8
		ASPA
		HLA-DMB
		XKR7
		CD7
		CD27
		SLIT3
		RSPO1
		NLRP7
		SHANK1
		RAB33A
		CD226
		SVOP
		TFAP2D
		LINC02785
		SPHK1
		LINC01142
		SLAMF8
		GPR141
		STX11
		AMPD1
		GPR176
		DPYSL5
		DPEP3
		ACOD1
		EBF3
		TAFA5
		LINC02544
		FCRL2
		EMX2OS
		CIDEA
		PSG5
		DGKB
		TREML4
		P2RY12
		MRC2
		LINC00400
		GSDMC
		NOX4
		VWF
		MCHR1
		PYHIN1
		CD300LG
		ABI3BP
		WDFY4
		OPRL1
		WAS
		HTRA3
		CGB2
		SFRP4
		LRRC15
		VSIG4
		TFF2
		CFAP58-DT
		CAMP
		JPH4
		CLCA2
		TNFSF18
		TRIM61
		SSTR3
		SRGN
		KIR3DL1
		PTX3
		CAMK1G
		C3orf80
		CCK
		FAM30A
		ERICH3
		LINC01076
		GLI3
		PSG1
		GJB7
		GREM1
		SCEL
		GRIA3
		KERA
		MEIS3
		REG3G
		RXFP1
		FMO1
		RAB7B
		FBN1
		S100A8
		C7
		LINC01506
		SLC10A2
		SIRPD
		KHDRBS2
		RAB31
		AIF1
		PANTR1
		KRT6A
		CLEC6A
		HEG1
		CCL2
		KRT81
		LINC00922
		GPR88
		NFAM1
		SIGLEC6
		IL6
		TRAPPC3L
		ANGPT1
		CCDC8
		LINC01561
		PRLHR
		ADGRA2
		TMEM100
		GAPT
		RNF165
		C4orf50
		LINC01048
		RAB39B
		ZFR2
		LINC00519
		UBASH3A
		THSD7B
		LAMP5
		ZNF831
		ACSM5
		GPR31
		PLIN1
		CXCR5
		ITGA4
		MAGEC2
		IRF4
		ITGAM
		DSPP
		M1AP
		ARSI
		TPSAB1
		PDPN
		LINC02285
		TTTY16
		CPA1
		COL3A1
		P2RY13
		LIPF
		PSG9
		KIR2DS4
		CD163
		CD37
		DPT
		KCNK2
		PRKAR2B
		KRT14
		IL1RAPL2
		SYNDIG1
		MOXD1
		PDGFRL
		LINC01781
		MFAP4
		GZMH
		CNNM1
		TYROBP
		GPR65
		TCP11
		RORB-AS1
		OSCAR
		C11orf21
		PECAM1
		TMEM155
		TNC
		GUCA2B
		CCR8
		LSP1
		ALOX15B
		IL2RA
		LINC02172
		FAP
		SCARA5
		HRH3
		ARHGAP9
		CCR1
		PTGDS
		LINC00996
		LRRC55
		TNFSF4
		TGFB3
		INHBA
		CDO1
		GPR183
		PROK1
		LILRB1
		CTSG
		LINC01831
		CD80
		RARRES2
		P2RY6
		SLC5A5
		PLXDC2
		CADM3
		KIR2DL3
		IQCA1
		IL9R
		PIK3CG
		ACKR1
		CYTL1
		FGF7
		GPR42
		CLECL1
		ANXA8L1
		CHST9
		LHX3
		LCE3D
		CD79A
		S1PR1
		GIMAP7
		SLAMF9
		FLT3
		SERPINB4
		HOXC9
		IL2
		DAZL
		SDK1
		LINC00582
		IFI44L
		PLD4
		TBR1
		IFNG
		CHRNA4
		IFIT1
		RETN
		LINC01230
		CCL8
		TNFSF13B
		SCN2A
		WNT7A
		CCDC80
		DOCK10
		TBC1D10C
		APOBEC3H
		GPR34
		CACNG3
		SASH3
		IL36A
		RXYLT1-AS1
		FCGR2C
		CA10
		CST6
		RASSF2
		NCR1
		CD52
		GPR50
		AVPR1A
		KLK5
		EFEMP2
		ICAM1
		CXCL9
		CAV1
		TBX5-AS1
		GBP6
		AEBP1
		DLX5
		SLC12A5-AS1
		CD300LB
		THBS2
		CTSL
		TPO
		GATA5
		APCS
		C19orf84
		USH1G
		CRNN
		KCNK13
		SEMA3D
		C1QB
		LYL1
		CBLN4
		KRTAP2-3
		SIGLEC10
		CYP11B1
		CD48
		ZEB2
		ITM2A
		NEUROD4
		H2AP
		OLFML2B
		TMEM121
		LILRB5
		CLEC12A
		CD3G
		LINC02611
		IL7R
		CYP26B1
		OR4C6
		CCL21
		LINC02345
		FMO2
		IL16
		HOXC-AS2
		SLC49A3
		CCR10
		SERPINE1
		SLC13A5
		CD96
		VCAM1
		DSEL
		PTAFR
		CD1E
		MIR223HG
		BEND6
		DPEP2
		MAGEL2
		FAM124B
		RSAD2
		FGFBP2
		ARHGEF6
		MIR205HG
		LCN6
		CHRD
		GLIPR1
		ITGA11
		PPP1R16B
		SLITRK1
		HLA-DRB1
		ADH1B
		ADAD2
		ANGPTL2
		WNT5A-AS1
		MYO1F
		NOG
		CD300LF
		LINC01705
		CHL1-AS2
		PSG6
		FCER2
		PIP
		ANKRD66
		LAPTM5
		MMP25
		FABP4
		RIMS2
		CXCL6
		ZBED2
		NPY2R
		CLEC4G
		COL6A3
		APOBEC3G
		CCR5
		EPHB6
		MYO1G
		GIMAP5
		CSF2RA
		PITX3
		GPX3
		CLEC4A
		HLA-DQB2
		LINC01010
		LINC02446
		GH1
		CCL25
		AIM2
		LINC00661
		TIMP2
		CDH12
		FCRLA
		CALHM6
		TLL1
		ADAMTS10
		COL10A1
		COL6A1
		SIGLEC11
		NLGN4Y
		IL11
		CERCAM
		HSD11B1
		MMRN1
		KRT6B
		PI16
		SPARC
		SBK2
		COL5A1
		REM1
		ANKRD1
		CFP
		GUCA1A
		TMEM119
		CLIC2
		PRICKLE1
		TPSD1
		CD69
		LTA
		GNGT2
		CTHRC1
		SIGLEC7
		GPC6
		BCAT1
		DNER
		CD300E
		HAS1
		ANKRD55
		LINC02555
		CCL3
		TFPI2
		CSF1R
		KCNJ15
		APBB1IP
		ITGB2-AS1
		CALHM2
		TNFSF14
		CRISPLD2
		SNAI2
		C8orf34-AS1
		ZFP57
		ZNF683
		CLDN18
		TNFAIP8L2
		HDC
		PCED1B-AS1
		IL2RB
		FAM180A
		TEX101
		CD274
		CP
		LINC00973
		SFRP1
		OLFML1
		LINC02829
		COPDA1
		SPRR2E
		KLRD1
		JCHAIN
		TP63
		CSF2RB
		ELMOD1
		MS4A14
		PTGIS
		MAMLD1
		SNCB
		VSTM1
		HCLS1
		LINC00891
		GPR15
		S100A9
		CSF2
		LINC02126
		MMP9
		SPOCK1
		HMSD
		CRCT1
		ADIPOQ
Str_UP	1073	FSTL1
		HPSE2
		FIBIN
		LINC02377
		CNTNAP1
		CYP26A1
		PRSS33
		CYP11A1
		H3C12
		DMP1
		LDB3
		PPP1R14A
		SLC6A11
		NAP1L2
		MITF
		NKX2-5
		CPXM2
		PEBP4
		MRGPRF-AS1
		CACNA2D1
		ZEB1
		EGFLAM-AS2
		ERG
		FAT4
		DIRAS1
		MSRB3
		FER1L6-AS1
		FGFR1
		FXYD6
		PHYHIP
		LRRN2
		TMEM132E
		DKK2
		OXT
		B4GALNT1
		PCAT19
		UNC45B
		LRFN5
		LPAR4
		GADL1
		MAP1LC3C
		LIMS2
		A2M
		BVES-AS1
		CNN1
		LINC02404
		PALLD
		LINC02450
		TEK
		LINC01198
		VGLL3
		RFPL2
		LINC01429
		PNMA6A
		AARD
		LINC02267
		CLEC1B
		DYSF
		EZHIP
		SLFN12
		SCUBE3
		PLEKHO1
		CNGA3
		NEFH
		A2ML1
		GUCY1A1
		TLR8-AS1
		LINC02823
		ZNF385B
		PABPC5
		VAT1L
		C6orf15
		ORM1
		SLC6A15
		CHST15
		P2RX3
		PIRT
		BCHE
		LINC00924
		FAM163A
		PCDH7
		MMP16
		HCRTR2
		KL
		LRRC4C
		FAM162B
		OBP2A
		COL18A1
		PXDN
		LINC01081
		LINC02015
		C14orf132
		NPR1
		RGS4
		MPPED2-AS1
		RTL3
		EDNRA
		ADAM23
		PTPN5
		MRGPRF
		GRIK2
		PENK
		SEPTIN4
		PCDH18
		LRRK2
		ACTC1
		CPEB1
		MAPK10
		TDRG1
		ECRG4
		QKI
		NCAM1
		GLIS2
		NACAD
		FENDRR
		FGF1
		COL7A1
		LINC01936
		TP73-AS1
		SEZ6
		VASH1
		CLEC3B
		CRP
		CMTM3
		LINC01579
		PNMA8C
		C8orf86
		MYH13
		HEPHL1
		TCF4
		GABRQ
		GNB4
		MYH1
		MYH2
		ADARB2-AS1
		TRIM49B
		LONRF2
		LINC02571
		BST1
		STON1
		HOMER3-AS1
		FHL1
		FN1
		ZFHX4-AS1
		CHRNA2
		ATP10A
		FAM225B
		PALM2AKAP2
		LINC00524
		MUC15
		LINC00475
		GNAO1
		WNT3A
		ZNF667
		NUAK1
		RIC3
		ART1
		KCNJ6
		LINC00682
		FSTL5
		LINC02314
		PHF21B
		CCM2L
		PIEZO2
		VSTM4
		MIR9-3HG
		LCN15
		OMD
		SVEP1
		SEMA3G
		MEIS1
		GALNT17
		BMP8A
		MAGEC1
		JPH2
		ATP2B2
		TMEM179
		CACNA1H
		TGFB2-AS1
		FST
		BVES
		LINC01629
		TUBA1A
		LEF1-AS1
		TCEAL6
		LINC02338
		UPK1B
		GPC5-AS1
		EPHA7
		THPO
		TYRP1
		TACR2
		SCN4B
		HAND2
		ROPN1
		KANK3
		NSG2
		GLI1
		LINC02506
		LINC01586
		WNT5A
		LINC02696
		C1QTNF7
		LHFPL6
		NEGR1
		MAP1A
		SSC5D
		WNT9A
		RNF150
		PRDM6
		MUCL3
		UTS2R
		NPY
		HHIPL1
		RUNX1T1
		CD93
		PCDH15
		ESR1
		GABRG3
		KCNN3
		PRF1
		TCF15
		MAB21L2
		SH2D3C
		C1QTNF2
		TRPC4
		RAMP3
		GAP43
		ZNF677
		CAND2
		RIMS1
		MAP6
		OR2L13
		ENPP2
		RNF175
		FHL5
		NRSN1
		MME
		DOCK4
		LINC00567
		CAVIN2
		SMIM28
		NRXN1
		BNC2-AS1
		NR4A3
		GAS1RR
		TMEFF2
		WDR86-AS1
		FIGN
		SP9
		PCSK2
		TSPAN2
		MORN5
		LINC01914
		GPM6A
		PPP1R17
		CLCNKB
		FILIP1
		MAGI2-AS3
		SPINK13
		MYOCD
		DPP6
		LSAMP
		ANGPTL1
		GRID1
		XKR3
		UBE2QL1
		MIR2117HG
		DAAM2
		PLXNA4
		ASPN
		LINC00504
		FATE1
		ADGRF5
		ANKRD65
		DCAF12L2
		ABCC9
		GSG1L
		CLNK
		GREM2
		C4B
		EMCN
		MUC22
		ZNF676
		COL9A1
		COL4A2
		MSC-AS1
		PAGE1
		SLC27A6
		GPIHBP1
		FNDC4
		ZNF835
		NLGN4X
		PPP4R3C
		CSDC2
		SPDYE4
		NXN
		F2RL2
		LRRC32
		KRTAP1-3
		SHE
		SLC2A14
		PALM
		OGN
		TCEAL2
		APELA
		SLC5A7
		ELFN2
		OR51B4
		ADCYAP1
		CCDC3
		DUPD1
		MFGE8
		PRPH2
		SLC30A8
		ZIM2-AS1
		NKX2-3
		MOV10L1
		LINC01197
		RFPL1S
		PSD
		TCEAL7
		SCG2
		IGF2-AS
		MMP14
		THSD7A
		RASL12
		PPFIA2
		MYL3
		ENOX1
		MYLK
		UNC5C
		PRIMA1
		DZIP1
		KIF17
		GPBAR1
		CFAP54
		KLHL38
		TMEM196
		CSMD2
		ADAMTS8
		SAMD11
		LCN10
		FAM225A
		ARHGEF15
		LINC02202
		MYT1L
		CEACAM21
		PDLIM4
		SLITRK3
		TAGLN3
		OPCML
		PALMD
		KRT38
		MGAT4C
		ADGRG2
		HSPA12B
		KLF17
		FEZ1
		DIRC3
		PLEKHG4B
		TRPV4
		NRG3
		MYOC
		F2R
		THBS1
		PICSAR
		TMEM52B
		ARMCX1
		VIP
		EBF2
		CRIP2
		DCAF4L2
		FOXS1
		TMEM114
		LINC02725
		LINC02712
		LINC02376
		SYNE1
		FAM110D
		TRPC6
		IRAG1
		TTC29
		LINC01684
		TMEM200C
		MFAP2
		LINC01018
		FZD8
		MCC
		GALNT14
		CCDC184
		FGF5
		H4C4
		VWC2
		PTPRN
		P2RX1
		TMEM200B
		NTNG1
		MRGPRE
		GNG11
		METTL24
		RHOJ
		CRMP1
		PGR
		MYOZ3
		PRPH
		FBXL7
		PCDH17
		FGF16
		CLIP4
		SLITRK2
		SGCD
		FILIP1L
		TMEM108
		CMTM5
		SCN7A
		PEG3
		GIPC3
		GPR85
		ZNF532
		CFAP61-AS1
		HAND2-AS1
		COL4A1
		SYDE1
		ADAMTS3
		GLI2
		ALDH1A3
		NAV3
		OR51E2
		FAM124A
		LOXL4
		CLIP3
		CNIH3-AS1
		UBE2E2
		MYL9
		CCN1
		SCEL-AS1
		LRRN4CL
		SOHLH1
		KCTD8
		LINC01192
		LINC02090
		MAGEE2
		PTPRM
		LINC02798
		TMEM59L
		SSPN
		CHRNA3
		ISLR2
		TPM2
		EDIL3-DT
		C20orf194
		GABRA5
		GRP
		SV2A
		RASSF8
		PDGFRA
		ADRB3
		TCTEX1D1
		RAB39A
		ARHGAP36
		ADCY2
		DLC1
		NEXMIF
		CDH19
		CCBE1
		BOC
		ZNF135
		TP53TG3D
		PGM5
		COL26A1
		MASP1
		LINC01300
		ASB5
		CAV2
		SPHKAP
		BCL6B
		WIPF1
		ATP8A2
		GSTM5
		CALD1
		LINC02089
		NHSL2
		ARHGEF25
		IL9
		SLC24A3
		TGFB1I1
		CCDC144NL-AS1
		COL24A1
		RSPO3
		CPT1C
		ANO3
		IGFBP3
		HSF5
		LINC02351
		PLPPR4
		FOXF2
		PRELP
		SLIT2
		BAALC
		HSPB7
		HACD4
		PLP1
		LOXHD1
		SERTM2
		PMP22
		WFDC1
		LINC00508
		PSCA
		BPI
		BNC2
		LINC01354
		XKR4
		TMTC1
		LDOC1
		NRK
		CYBRD1
		OBP2B
		LBH
		SYNM
		RPRM
		FAM167A-AS1
		HSD17B14
		H2BC3
		PHLDB2
		FLT4
		ADAMTSL1
		SYT16
		RTL8B
		AOX1
		AKT3
		KCNJ8
		HSD17B6
		MAB21L1
		ADARB2
		GJA5
		PDE6B-AS1
		HGF
		KCNE4
		CH25H
		H1-4
		ADAMTS7
		LINC02078
		S1PR3
		HECW1
		SCN3B
		LINC01580
		PTGER3
		ERBB4
		SLC6A2
		PTN
		TMEM130
		LINC02106
		DMRT1
		ANKRD34B
		MICU3
		LINC00839
		TGFB2
		MPPED2
		SACS-AS1
		CHRDL1
		HSPB8
		CTNND2
		MROH2A
		SUSD5
		COL22A1
		MEX3B
		NID1
		ITIH5
		HOXC13
		TMEM204
		OR10AC1
		MMRN2
		COL20A1
		SYNPO2
		LINC01419
		NUDT10
		MSN
		MUSK
		GPR162
		PLIN4
		GJA1
		JAM3
		IL6-AS1
		LUCAT1
		FOXR2
		LINC02185
		ZNF454
		POU3F4
		NOS1
		CLDN11
		PRL
		LINC00160
		LRRC8C
		PLN
		SLC18A3
		UCHL1
		SHISA3
		GASK1A
		FBN2
		RERG
		RFTN1
		CCDC141
		NPPB
		ANKRD35
		CNTN4
		DACT3
		FRRS1L
		SYT5
		LINC01973
		SEMA3E
		CRYAB
		SYNC
		PNMA5
		FNDC1-IT1
		LRRC17
		TMPRSS11E
		LINC01581
		RNF180
		DCLK1
		TMCO2
		NEFM
		SYPL2
		COL21A1
		NTNG2
		ADCY5
		TUBA3C
		MYOSLID
		HMCN1
		FAM135B
		PINLYP
		NRP2
		CDH2
		COX7B2
		CECR7
		LINC01412
		EPHA5
		LINC02593
		LINC00987
		FLNC
		CADM3-AS1
		SGIP1
		ARL4C
		GIP
		ADGRL2
		CAVIN1
[truncated: 912 more rows]
